# Supplementary material for: Robust Prognostic Subtyping of Muscle-Invasive Bladder Cancer Revealed by Deep Learning-Based Multi-Omics Data Integration
Source: Front Oncol. 2021 Aug 6;11:689626. doi: 10.3389/fonc.2021.689626 (PMC8378227; doi:10.3389/fonc.2021.689626)
Supplement: Supplementary file 3 [file Table_1.xlsx]

## Sheet: Sheet1
Table S1. Univariate cox proportional-hazards regression analysis results of 100 new features.
gene	p_Chisq	p_sctest	p_waldtest	p_logtest	HR
F92	1.19543e-05	1.19293e-05	1.73087e-05	1.01095e-05	0.502732
F34	4.6552e-06	4.61788e-06	7.42525e-06	2.17026e-05	0.479556
F60	4.6552e-06	4.61788e-06	7.42525e-06	2.17026e-05	0.479556
F75	4.6552e-06	4.61788e-06	7.42525e-06	2.17026e-05	0.479556
F79	4.6552e-06	4.61788e-06	7.42525e-06	2.17026e-05	2.08526
F25	7.13458e-06	7.05674e-06	1.09222e-05	2.93852e-05	0.488155
F55	7.13458e-06	7.05674e-06	1.09222e-05	2.93852e-05	2.04853
F66	7.13458e-06	7.05674e-06	1.09222e-05	2.93852e-05	0.488155
F86	7.13458e-06	7.05674e-06	1.09222e-05	2.93852e-05	0.488155
F73	8.83447e-06	8.73301e-06	1.33472e-05	3.5807e-05	2.04147
F9	8.83447e-06	8.73301e-06	1.33472e-05	3.5807e-05	2.04147
F12	1.45956e-05	1.44882e-05	2.13126e-05	5.34594e-05	2.00662
F24	1.45956e-05	1.44882e-05	2.13126e-05	5.34594e-05	2.00662
F48	1.45956e-05	1.44882e-05	2.13126e-05	5.34594e-05	2.00662
F62	1.81398e-05	1.80209e-05	2.59671e-05	6.17091e-05	1.98667
F64	1.81398e-05	1.80209e-05	2.59671e-05	6.17091e-05	1.98667
F71	1.81398e-05	1.80209e-05	2.59671e-05	6.17091e-05	0.503354
F78	1.81398e-05	1.80209e-05	2.59671e-05	6.17091e-05	0.503354
F81	1.81398e-05	1.80209e-05	2.59671e-05	6.17091e-05	1.98667
F90	1.81398e-05	1.80209e-05	2.59671e-05	6.17091e-05	0.503354
F97	1.81398e-05	1.80209e-05	2.59671e-05	6.17091e-05	0.503354
F19	1.94674e-05	1.93246e-05	2.78074e-05	6.71068e-05	1.98799
F45	1.94674e-05	1.93246e-05	2.78074e-05	6.71068e-05	0.503019
F57	1.94674e-05	1.93246e-05	2.78074e-05	6.71068e-05	0.503019
F88	1.94674e-05	1.93246e-05	2.78074e-05	6.71068e-05	1.98799
F93	2.18085e-05	2.15739e-05	3.08358e-05	7.34912e-05	0.505394
F15	3.33541e-05	3.31528e-05	4.57874e-05	0.000100764	1.94481
F54	3.33541e-05	3.31528e-05	4.57874e-05	0.000100764	1.94481
F70	3.33541e-05	3.31528e-05	4.57874e-05	0.000100764	0.514188
F87	3.33541e-05	3.31528e-05	4.57874e-05	0.000100764	0.514188
F39	4.44378e-05	4.4229e-05	5.9596e-05	0.000121519	0.522656
F76	4.44378e-05	4.4229e-05	5.9596e-05	0.000121519	0.522656
F91	4.2879e-05	4.24199e-05	5.80498e-05	0.0001296	0.515942
F65	8.49953e-05	8.4637e-05	0.000106554	0.000142934	1.80491
F35	0.000101481	0.000101261	0.00012666	0.000179571	0.555424
F83	0.000101481	0.000101261	0.00012666	0.000179571	0.555424
F28	7.74932e-05	7.72213e-05	0.000100254	0.000188112	0.534665
F10	7.78933e-05	7.75574e-05	0.000100905	0.000192936	0.533437
F99	0.000115802	0.000115409	0.00014335	0.000201458	1.79216
F42	7.96821e-05	7.92055e-05	0.00010368	0.000209184	1.89016
F49	7.96821e-05	7.92055e-05	0.00010368	0.000209184	0.529056
F23	7.94829e-05	7.89257e-05	0.000103885	0.000217613	0.525222
F27	9.68697e-05	9.62869e-05	0.000123035	0.000218316	0.542547
F11	9.11861e-05	9.07499e-05	0.000117228	0.000224296	0.53505
F37	9.11861e-05	9.07499e-05	0.000117228	0.000224296	0.53505
F33	0.000143782	0.000143328	0.000175688	0.000232522	0.564138
F77	0.000103365	0.000102342	0.000132371	0.000264646	1.87534
F41	0.000195618	0.000195159	0.000236235	0.000325733	1.75983
F4	0.000137654	0.000136346	0.000173328	0.000334477	0.539083
F63	0.000154331	0.000153561	0.000192816	0.000353693	1.83699
F8	0.000154331	0.000153561	0.000192816	0.000353693	0.544369
F68	0.00024528	0.000245018	0.000292762	0.00038147	1.73925
F80	0.00017634	0.000174783	0.000218527	0.000402589	0.546095
F5	0.000263104	0.000262137	0.00031239	0.000411054	1.73664
F89	0.000272572	0.00027129	0.000323718	0.000449142	0.573918
F26	0.000216258	0.000214167	0.000265908	0.000494377	1.82798
F74	0.000216258	0.000214167	0.000265908	0.000494377	1.82798
F16	0.000424489	0.00042286	0.000493401	0.000639619	1.7065
F96	0.000454865	0.00045271	0.000525781	0.000646676	1.69506
F67	0.000405583	0.0004052	0.000475788	0.000667547	0.580468
F6	0.000340845	0.0003381	0.000407859	0.000697107	0.560765
F52	0.000374404	0.000373241	0.000445351	0.000719041	0.56688
F14	0.000474855	0.000474424	0.000553088	0.00076685	0.584083
F1	0.000443295	0.000440798	0.000520643	0.000807084	1.74115
F13	0.000443295	0.000440798	0.000520643	0.000807084	1.74115
F32	0.000443295	0.000440798	0.000520643	0.000807084	1.74115
F40	0.000443295	0.000440798	0.000520643	0.000807084	1.74115
F20	0.000496671	0.000493318	0.000579548	0.000888722	0.576959
F17	0.000462376	0.000459368	0.000547543	0.000930647	0.564539
F53	0.000563739	0.000560164	0.000653409	0.000977606	1.72029
F2	0.000671254	0.000670751	0.000770267	0.00104131	0.592328
F18	0.000748513	0.000742202	0.000867853	0.00144675	1.75588
F36	0.000748513	0.000742202	0.000867853	0.00144675	0.569516
F50	0.000748513	0.000742202	0.000867853	0.00144675	0.569516
F95	0.000767954	0.000761242	0.000892707	0.00151699	0.56527
F56	0.0012452	0.00124145	0.00138274	0.00153076	0.616395
F94	0.00108024	0.00107599	0.00122387	0.00178728	1.68404
F3	0.00120586	0.00119937	0.00136466	0.00206367	1.69302
F38	0.00168516	0.0016862	0.00186068	0.00219433	0.62143
F7	0.00211266	0.00210609	0.00230352	0.00253357	1.5864
F59	0.00166538	0.0016559	0.0018611	0.00275283	1.67268
F47	0.00179804	0.00178886	0.00199527	0.00280942	1.64962
F85	0.00282045	0.00280351	0.00309319	0.00442244	0.609631
F61	0.00331712	0.00329944	0.00359818	0.00481637	0.621099
F72	0.00428827	0.0042629	0.00463674	0.00640951	0.620875
F58	0.00476249	0.00473923	0.00513583	0.00702605	1.60159
F51	0.00619862	0.00615889	0.00660134	0.00863582	0.635199
F31	0.00738938	0.00735859	0.00781373	0.00966083	1.53827
F30	0.00841816	0.00837887	0.00889809	0.0113321	1.5476
F98	0.00903075	0.00897831	0.00952877	0.012226	1.54977
F82	0.00938735	0.00933724	0.00989119	0.0125578	1.5425
F43	0.0178148	0.0178199	0.0188109	0.0139878	0.634622
F29	0.0301129	0.0300745	0.0310671	0.0261612	0.681689
F0	0.0225217	0.0224136	0.0232665	0.0280412	1.47799
F21	0.0338535	0.0338373	0.0347159	0.0313157	0.709091
F44	0.0253901	0.0252858	0.0262062	0.0315989	0.678675
F46	0.036284	0.0361308	0.0370895	0.0425119	1.42047
F69	0.0364799	0.0363039	0.0373988	0.0444333	1.45627
F84	0.0920496	0.0919994	0.0933229	0.0838738	0.730123
F22	0.119993	0.120032	0.120957	0.116921	1.27736
