# Supplementary material for: Robust Prognostic Subtyping of Muscle-Invasive Bladder Cancer Revealed by Deep Learning-Based Multi-Omics Data Integration
Source: Front Oncol. 2021 Aug 6;11:689626. doi: 10.3389/fonc.2021.689626 (PMC8378227; doi:10.3389/fonc.2021.689626)
Supplement: Supplementary file 4 [file Table_2.xlsx]

## Sheet: Sheet1
Table S2. Regions of copy number alteration that are significantly different between the S1 and S2 groups (padj < 0.05; Chi-squared contingency table tests).
Cytobands	Type	Chromosome	Start	End	S1 frequency	S2 frequency	Pval	Padj	TSG
3p26.3	Del	chr3	0	2800000	0.13	0.39	5.19502e-07	0.000817695
3p26.2	Del	chr3	2800000	4000000	0.12	0.38	2.76594e-07	0.000435359
3p26.1	Del	chr3	4000000	8700000	0.1	0.38	6.83619e-09	1.07602e-05
3p25.3	Del	chr3	8700000	11800000	0.08	0.37	2.11455e-10	3.3283e-07	FANCD2, VHL
3p25.2	Del	chr3	11800000	13300000	0.07	0.36	4.81392e-11	7.57711e-08	PPARG
3p25.1	Del	chr3	13300000	16400000	0.09	0.39	2.26548e-10	3.56586e-07	XPC
3p24.3	Del	chr3	16400000	23900000	0.11	0.42	6.2197e-10	9.7898e-07
3p24.2	Del	chr3	23900000	26400000	0.12	0.42	4.59226e-09	7.22822e-06
3p24.1	Del	chr3	26400000	30900000	0.13	0.45	1.1936e-09	1.87872e-06	TGFBR2
3p23	Del	chr3	30900000	32100000	0.13	0.47	1.30563e-10	2.05506e-07
3p22.3	Del	chr3	32100000	36500000	0.12	0.47	1.60699e-11	2.5294e-08
3p22.2	Del	chr3	36500000	39400000	0.14	0.49	9.80054e-11	1.54261e-07	MLH1
3p22.1	Del	chr3	39400000	43700000	0.17	0.51	2.1853e-09	3.43966e-06
3p21.33	Del	chr3	43700000	44100000	0.18	0.52	3.76154e-09	5.92066e-06
3p21.32	Del	chr3	44100000	44200000	0.18	0.52	3.76154e-09	5.92066e-06
3p21.31	Del	chr3	44200000	50600000	0.23	0.54	4.03493e-07	0.000635098	SETD2, RHOA
3p21.2	Del	chr3	50600000	52300000	0.26	0.53	1.75247e-05	0.0275838
3p12.2	Del	chr3	79800000	83500000	0.2	0.48	1.9308e-06	0.00303908
3p12.1	Del	chr3	83500000	87200000	0.16	0.42	2.33841e-06	0.00368065
3p11.2	Del	chr3	87200000	87900000	0.15	0.4	3.55713e-06	0.00559893
3p11.1	Del	chr3	87900000	91000000	0.14	0.38	5.3054e-06	0.0083507
